1 **Selection of internal references for transcriptomics and RT-**  
2 **qPCR assays in Neurofibromatosis type 1 (NF1) related**  
3 **Schwann cell lines**

4 Yi-Hui Gu<sup>¶</sup>, Xi-Wei Cui<sup>¶</sup>, Jie-Yi Ren<sup>¶</sup>, Man-Mei Long<sup>2</sup>, Wei Wang<sup>1</sup>, Cheng-Jiang  
5 Wei<sup>1</sup>, Rehanguli Aimaier<sup>1</sup>, Yue-Hua Li<sup>1</sup>, Man-Hon Chung<sup>1</sup>, Bin Gu<sup>1</sup>, Qing-Feng Li<sup>1</sup>,  
6 <sup>#b</sup>, Zhi-Chao Wang<sup>1</sup>, <sup>#a</sup>.

7

8

9 <sup>1</sup>Department of Plastic and Reconstructive Surgery, Shanghai Ninth People's

10 Hospital, Shanghai Jiao Tong University School of Medicine, Shanghai, China

11 <sup>2</sup>Department of Pathology, Shanghai Ninth People's Hospital, Shanghai Jiao Tong

12 University School of Medicine, Shanghai, China

13

14

15

16 \*Corresponding Author:

17 Email: [liqingfeng@shsmu.edu.cn](mailto:liqingfeng@shsmu.edu.cn) (QF L)

18 Email: [shmuwzc@163.com](mailto:shmuwzc@163.com) (ZC W)

19

20

21

22 <sup>¶</sup>These authors contributed equally to this work.

23 <sup>&</sup>These authors also contributed equally to this work.

24

## 25 **Abstract**

26 Transcriptomics has been widely applied in uncovering disease mechanisms and  
27 screening potential biomarkers. Internal reference selection determines the accuracy  
28 and reproducibility of data analyses. The aim of this study was to identify the most  
29 qualified reference genes for the relative quantitation analysis of transcriptomics and  
30 real-time quantitative reverse-transcription PCR in fourteen NF1 related cell lines,  
31 including non-tumor, benign and malignant Schwann cell lines. The expression  
32 characteristics of eleven candidate reference genes (RPS18, ACTB, B2M, GAPDH,  
33 PPIA, HPRT1, TBP, UBC, RPLP0, TFRC and RPL32) were screened and analyzed  
34 by four software programs: geNorm, NormFinder, BestKeeper and RefFinder. Results  
35 showed that GAPDH, the most used internal reference gene, was significantly  
36 unstable. The combinational use of two reference genes (PPIA and TBP) was optimal  
37 in malignant Schwann cell lines and the use of single reference genes (PPIA or  
38 PRLP0) alone or in combination was optimal in benign Schwann cell lines. Our  
39 recommended internal reference genes may improve the accuracy and reproducibility  
40 of the results of transcriptomics and real-time quantitative reverse-transcription PCR  
41 in further gene expression analyses of NF1 related tumors.

## 42 **Introduction**

43 Neurofibromatosis type 1 (NF1) is an autosomal dominantly inherited tumor  
44 predisposition syndrome that affects multiple organ systems and has a wide range of  
45 variable clinical manifestations, such as pigmentary lesions, skeletal abnormalities[1-  
46 3]. The major defining features in NF1 patients are peripheral nerve sheath tumors,  
47 including plexiform neurofibromas (pNF) and malignant peripheral nerve sheath  
48 tumors (MPNST)[4]. Therefore, the majority of NF1 related tumor researches could be  
49 categorized into benign tumor studies or malignant tumor studies.

50 Currently, Omics studies play an increasingly important role in uncovering disease  
51 mechanisms and screening potential therapeutic biomarkers. Among different omics  
52 studies, transcriptomics is the bridge between genomics and proteomics. Key methods,  
53 including microarray and RNA-seq, could provide deep and precise measurements of  
54 levels of transcripts and different isoforms. Several studies are conducted to figure out  
55 the molecular mechanisms of NF1 and to advance the development of targeted drugs[5-  
56 7]. These high-throughput results need further validation by real-time quantitative  
57 reverse-transcription PCR (RT-qPCR), which is considered as the gold standard for  
58 gene expression studies. However, the accuracy and reproducibility of these results may  
59 be affected by several factors at multiple stages. In data analysis, the stability of  
60 reference genes is critical for appropriate standardization and obtaining accurate gene  
61 expression data. The Minimum Information for Publication of Quantitative Real-Time

62 PCR experiments (MIQE) guidelines highlight the importance of experimental  
63 validation of reference genes for particular tissues or cell types[8-11]. However, to date,  
64 there is no previous research on the validation of suitable reference genes for the  
65 relative quantification analysis of target gene expression in NF1 related cell lines.

66 In the present study, eleven candidate reference genes, which are most frequently  
67 used for relative quantification analysis in other neoplastic diseases, were selected,  
68 including 18S Ribosomal RNA (RPS18),  $\beta$ -actin (ACTB),  $\beta$ -2-microglobulin (B2M),  
69 Glyceraldehyde-3-phosphate dehydrogenase (GAPDH), Peptidylprolyl isomerase A  
70 (PPIA), Hypoxanthine phosphoribosyltransferase 1 (HPRT1), TATA binding protein  
71 (TBP), Ubiquitin C (UBC), Ribosomal protein large P0 (RPLP0), Transferrin receptor  
72 (P90, CD71) (TFRC), and Ribosomal protein 32 (RPL32)[12-16].

73 We investigated the stability of these eleven reference genes in fourteen different  
74 NF1 related cell lines, including two non-tumor *NF1*<sup>+/-</sup> Schwann cell lines, five benign  
75 pNF cell lines and seven malignant MPNST cell lines. Based on study design, we  
76 analyzed the data obtained as two separate groups: (1) benign NF1 tumor study  
77 including Schwann cell (SC) + pNF cell lines and (2) malignant NF1 tumor study  
78 including SC + pNF + MPNST cell lines, aiming to identify the most qualified reference  
79 genes for gene expression analysis in benign and malignant NF1 tumor study  
80 respectively.

## 81 **Materials and Methods**

### 82 **Neurofibromatosis type 1 (NF1) related cell lines**

83 Five MPNST cell lines (ST-8814, STS26T, S462, S462TY, T265) were generous  
84 gifts from Dr. Vincent W Keng (Department of Applied Biology and Chemical  
85 Technology, The Hong Kong Polytechnic University, Kowloon, Hong Kong) and  
86 Jilong Yang (International Medical School, Tianjin Medical University, Tianjin). Two  
87 pNF cell lines (A68 and WZJ) are immortalized as described previously[17]. Ethics  
88 Committee of Shanghai Ninth People's Hospital, Shanghai Jiao Tong University  
89 School of Medicine approved this study. Informed consent was achieved from patients  
90 under institutional reviewer board protocols. hTERT NF1 ipNF05.5 (ATCC<sup>®</sup> CRL-  
91 3388<sup>TM</sup>), hTERT NF1 ipNF95.6 (ATCC<sup>®</sup> CRL3389<sup>TM</sup>), hTERT NF1 ipNF95.11b  
92 (ATCC<sup>®</sup> CRL3390<sup>TM</sup>), hTERT NF1 ipnNF95.11c (ATCC<sup>®</sup> CRL3391<sup>TM</sup>), hTERT NF1  
93 ipn02.3 2 $\lambda$  (ATCC<sup>®</sup> CRL3392<sup>TM</sup>), sNF96.2 (ATCC<sup>®</sup> CRL2884<sup>TM</sup>) and sNF02.2  
94 (ATCC<sup>®</sup> CRL2885<sup>TM</sup>) were obtained from the American Type Culture Collection  
95 (ATCC). All the cell lines used in this study were cultivated in Dulbecco's Modified  
96 Eagle Medium (DMEM) supplemented with 10% fetal bovine serum (FBS) and 1%  
97 penicillin/streptomycin at 37°C in a humidified incubator at 5% CO<sub>2</sub> and were

98 confirmed negative for mycoplasma prior to use. Verification of cell lines was  
99 performed by Short Tandem Repeat (STR) DNA profiling (Applied Biological  
100 Materials Inc, Canada).

## 101 **Total RNA extraction and cDNA synthesis**

102 Total RNA was extracted from all NF1 related cell lines using AxyPrep Multisource  
103 RNA Miniprep Kit (Axygen, USA) according to the manufacturer's instructions. The  
104 quality and quantity of RNA were measured using a NanoDrop 2000  
105 Spectrophotometer (Thermo Scientific, Waltham, MA, USA) through OD260/280 and  
106 OD260/230 ratios. 500 ng of total RNA was used for the cDNA synthesis reaction using  
107 PrimeScript™ RT Master Mix kit (TaKaRa RR036A) according to the manufacturer's  
108 instructions. After the reaction, the cDNA was diluted to 20 ng/ml. All RT-qPCR  
109 experiments were performed with the same batch of cDNA.

## 110 **RT-qPCR**

111 Reference gene primers were designed and synthesized by Sangon Biotech  
112 (Shanghai, China). The efficiency, dynamic range and specificity of all primers were  
113 tested by Sangon Biotech (Shanghai, China). RT-qPCR was performed using TB  
114 Green® Premix Ex Taq™ Kit (TaKaRa RR420A) on a Applied Biosystems 7500 Real-  
115 Time PCR System, as described previously[18]. Each sample was measured in three  
116 technical replicates. The relative quantification of RT-qPCR data were calculated using  
117 the  $2^{-\Delta\Delta C_T}$  method, as described previously[8].

## 118 **Statistical analysis**

119 The stability of the eleven candidate reference genes was examined by four  
120 frequently used software programs, geNorm[19], NormFinder[20] BestKeeper[21] and  
121 RefFinder[22], as described previously[23-26].

122

## 123 **Results**

124 **The expression characteristics of eleven internal reference**  
125 **gene candidates**

126 The threshold cycle ( $C_t$ ) value was used to assess the expression characteristics of  
127 the internal reference gene candidates. Higher  $C_t$  values indicate lower expression  
128 levels. The distribution of the  $C_t$  values of eleven reference genes in fourteen samples,  
129 including two *NF1*<sup>+/-</sup> Schwann cell lines, five plexiform neurofibroma cell lines and  
130 seven MPNST cell lines was displayed in Fig 1. The  $C_t$  values represented in this  
131 research from all samples ranged from 18.09 to 43.65. It is worth noting that UBC  
132 showed significantly higher  $C_t$  values in MPNST samples compared to other samples,  
133 suggesting lower mRNA expression level.

134

## 135 **Genorm analysis**

136

137 In order to identify the best reference genes for benign and malignant NF1 tumor  
138 study, we applied four statistical approaches including geNorm, NormFinder,  
139 BestKeeper and  $\Delta C_t$  method. The  $M$  value of eleven reference genes were calculated  
140 and ranked by genorm. The genorm system identifies those genes with lowest  $M$  values  
141 as the most stably expressed genes and an  $M$  value under 0.5 represents relatively stable  
142 gene expression. GeNorm analysis showed that PPIA and TBP, sharing an  $M$  value of  
143 0.549, were the most stable reference genes in SC + pNF + MPNST cell lines (Fig 2).  
144 However, when only considering SC + pNF cell lines, the most stable genes were PPIA  
145 and PRLP, with an  $M$  value of 0.225, followed by TBP and S18 ( $M$  value, 0.295 and  
146 0.454, respectively). The optimal number of reference genes to obtain a stable  
147 normalization index was demonstrated by V-values. When SC + pNF + MPNST cell  
148 lines were considered, the V8/9 value was 0.127, indicating that eight reference genes  
149 combination is optimal for RT-qPCR normalization. In SC + pNF cell lines, the V2/3  
150 value was 0.104, suggesting that merely two reference genes were necessary. And the  
151 V8/9 value was lower than 0.110 in this group, of which the V values kept stable in  
152 different subsets.

153

## 154 **NormFinder analysis**

155

156 Eleven reference genes underwent normalization factor calculation and were ranked  
157 by NormFinder according to their minimal combined SC, pNF and MPNST gene  
158 expression variation. According to the result, TBP was the optimal reference gene  
159 (stability value, 0.394), followed by PPIA, ACTB and GAPDH (stability values, 0.403,  
160 0.427 and 0559 respectively) (Fig 3). The best combination of two genes are GAPDH  
161 and S18 with a combination stability value of 0.150. For SC + pNF cell lines, PPIA,  
162 RPLP and TBP were the most stably expressed genes (stability values, 0.142, 0.185  
163 and 0.186 respectively), while the rest ones were extremely unstable amongst those cell  
164 lines.

165

## 166 **Best keeper analysis**

167

168 In best keeper algorithm, the  $C_t$  values, SD (standard deviation) and CV (coefficient  
169 of variance) of each gene were calculated and analyzed to identify stable reference gene  
170 candidates. Under general conditions, genes with a SD greater than 1.0 are determined  
171 to be unstable. Among SC + pNF + MPNST cell lines, TBP turned out to be the best  
172 choice with a standard deviation [+/- CP] (which is the stability value in best keeper  
173 algorithm) of 0.48 (Fig 4). The stability value of TBP kept stable (0.44) when it came  
174 to SC + pNF cell lines. However, RPLP and PPIA were esteemed as more stable genes,  
175 sharing a stability value of 0.42.

176

## 177 **$\Delta C_t$ analysis**

178

179 In  $\Delta C_t$  method, the differential expression of “gene pairs” were analyzed to  
180 determine the optimal reference genes. According to the results, PPIA (1.24) and TBP  
181 (1.26) were the most stably expressed reference genes in SC + pNF + MPNST cell lines  
182 (Fig 5). While RPLP (0.78) was far more stable in SC + pNF cell lines.

183

## 184 **Comprehensive ranking order**

185

186 Using RefFinder, we integrated four analysis approaches mentioned above to  
187 comprehensively evaluate the expression stability of these candidate genes. PPIA  
188 turned out to be the optimal reference gene in SC + pNF + MPNST cell lines with a  
189 ranking value of 1.19, followed by TBP and S18 (ranking value, 1.41 and 3.66,  
190 respectively) (Fig 6). And PRLP (1.19) was the most stably expressed in SC + pNF cell  
191 lines.

## 192 **Discussion**

193 High-throughput transcriptome sequencing identifies the key pathogenic genes that  
194 play crucial roles in the pathogenesis, development and malignant transformation of  
195 NF1 related neurofibroma. RT-qPCR has been considered as golden standard for gene  
196 expression analysis because of its accuracy and sensitivity[27]. It is a robust and  
197 specific method for the validation of the identity of these pathogenic genes that  
198 aberrantly expressed in neurofibroma.

199 The ease to generate RT-qPCR data is in sharp contrast with the challenges to  
200 guarantee that the results obtained are reliable. In the absence of proper reference genes,  
201 data obtained are possibly inaccurate and unreproducible, as it has been shown that the

202 use of a single reference gene without validation results in a significant bias (ranging  
203 from 3-fold in 25% of the results up to 6-fold in 10% of the results)[19].

204 Prior to this study, no validated reference gene has been identified for NF1 related cell  
205 lines. In previous studies, GAPDH and ACTB have been most frequently used in gene  
206 expression analysis of NF1 without solid validation[28-30]. However, the expression  
207 characteristics of reference genes vary remarkably under different experimental  
208 conditions and with different samples. The use of GAPDH and ACTB as an internal  
209 control has been proven to be unsuitable in other samples, such as lymphoblastoid cell  
210 lines and human mesenchymal stem cells[31-33]. Therefore, it is crucial to confirm  
211 reliable and qualified reference genes for particular tissues or cell types and specific  
212 experimental designs.

213 In our study, in order to find the internal reference genes stably expressed in different  
214 NF1 samples, including normal peripheral nerve, benign and malignant tumor tissues,  
215 we investigated fourteen different NF1 related cell lines, derived respectively from the  
216 tissues mentioned above, which include two non-tumor *NF1*<sup>+/-</sup> Schwann cell lines, five  
217 pNF cell lines and seven MPNST cell lines. The expression stability of eleven  
218 frequently used reference genes, including RPS18, ACTB, B2M, GAPDH, PPIA,  
219 HPRT1, TBP, UBC, RPLP0, TFRC, and RPL32 were investigated and analyzed  
220 separately in these cell lines.

221 Four different mathematical and statistical models were utilized to analyze the data  
222 obtained, including geNorm, NormFinder, BestKeeper and  $\Delta C_t$ . Each model uses  
223 different algorithms to estimate both the intra- and the intergroup expression variations  
224 and rank candidate genes based on the instability score. GeNorm and NormFinder use  
225 the stability (actually instability) value,  $\Delta C_t$  uses the average of S.D. and BestKeeper  
226 uses the S.D. of the crossing points[19-21]. In addition, A web-based tool RefFinder  
227 was finally used to evaluate the stability of candidate reference genes and identify the  
228 most stable gene by calculating the geometric mean of ranking values obtained from  
229 the above-mentioned four methods[22].

230 Due to the fact that the software applied are based on different mathematical models,  
231 the ranking orders of reference gene stabilities varied slightly between these tools.  
232 However, the top two positions of reference genes in SC + pNF group and SC + pNF +  
233 MPNST group determined by geNorm were identical to those determined by  
234 NormFinder, BestKeeper and  $\Delta C_t$ . Unanimously, according to the results of RefFinder,  
235 the top two reference genes in two groups are also the same and they share similar  
236 ranking values which are significantly lower than others. Therefore, conclusion can be  
237 drawn that PPIA and RPLP0 are the best reference genes for normalization in benign  
238 NF1 tumor study, while PPIA and TBP are as well in malignant NF1 tumor study.

239 PPIA is a gene encoding for a cyclosporin binding-protein, TBP is a gene encoding  
240 for a TATA-binding protein, and PRLP0 encodes a ribosomal protein that is a  
241 component of the 60S subunit. In NF1 related tumors, they were stably expressed  
242 irrespective of tumor pathology and severity. However, the most frequently used  
243 reference gene GAPDH was proved to be an inappropriate option in two groups ( $M$   
244 values  $> 0.5$ ). As a multifunctional gene, the use of GAPDH as a reference gene has  
245 been also questioned and challenged in other cancers including lung cancer[34], breast  
246 cancer[35] and bladder cancer[36]. Accumulated evidences indicate that GAPDH is  
247 deregulated in various cancers under certain conditions and potentially participates in  
248 tumorigenesis and tumor progression[34-38].

249 In addition, considering the difference of opinion on the minimal number of  
250 reference genes required for RT-qPCR, we explored the necessity of selecting multiple  
251 reference genes for data normalization in our samples. In previous studies, some  
252 investigators showed that the combination of more than one reference gene improved  
253 the accuracy of results[14, 19, 39-41] while other investigators proved that  
254 normalization with a single gene is sufficient for most research applications[12, 36, 42,  
255 43]. In present study, according to the analyses of geNorm, combination of eight  
256 reference genes is the most precise plan for normalization in SC + pNF + MPNST group.  
257 However, considering the stability and precision of using two reference genes in  
258 combination is sufficient for data normalization, we suggest using a normalization  
259 factor calculated by the geometrical mean of the most stable reference genes (PPIA and  
260 TBP) for normalization of target gene expression in SC, pNF and MPNST cells[44].  
261 What's more, it is worth noting that the use of single reference gene, with a  $M$ -value  
262 over 0.5, should be avoided in these samples. In SC + pNF group, although the  
263 combination of two reference genes significantly improved precision over  
264 normalization with PPIA or PRLP0 alone, the use of single reference genes (PPIA or  
265 PRLP0), sharing an  $M$  value of 0.225, is acceptable for data normalization.

## 266 **Conclusions**

267 In this study, we systematically explored the suitability of fourteen candidate  
268 reference genes for normalization of gene expression in different NF1 related cell  
269 lines, including non-tumor *NF1*<sup>+/-</sup> Schwann cell lines, pNF cell lines and MPNST cell  
270 lines. According to the results, we recommend using two reference genes (PPIA and  
271 TBP) in combination for gene expression analyses in MPNST related researches and  
272 using single reference genes (PPIA or PRLP0) alone or in combination in pNF related  
273 studies.

## 274 **Acknowledgments**



275 Grateful acknowledgment is made to Prof. Jilong Yang and Prof. Vincent Keng,  
276 who kindly granted MPNST cell lines.

## 277 **References**

- 278 1. Gutmann DH, Ferner RE, Listernick RH, Korf BR, Wolters PL, Johnson KJ.  
279 Neurofibromatosis type 1. *Nature Reviews Disease Primers*. 2017;3(1). doi:  
280 10.1038/nrdp.2017.4.
- 281 2. Stevenson DA, Zhou H, Ashrafi S, Messiaen LM, Carey JC, D'Astous JL, et al.  
282 Double inactivation of NF1 in tibial pseudarthrosis. *Am J Hum Genet*.  
283 2006;79(1):143-8. Epub 2006/06/15. doi: 10.1086/504441. PubMed PMID:  
284 16773574; PubMed Central PMCID: PMCPMC1474128.
- 285 3. De Schepper S, Maertens O, Callens T, Naeyaert JM, Lambert J, Messiaen L.  
286 Somatic mutation analysis in NF1 cafe au lait spots reveals two NF1 hits in the  
287 melanocytes. *J Invest Dermatol*. 2008;128(4):1050-3. Epub 2007/10/05. doi:  
288 10.1038/sj.jid.5701095. PubMed PMID: 17914445.
- 289 4. Ariel IM. Tumors of the peripheral nervous system. *Semin Surg Oncol*.  
290 1988;4(1):7-12. Epub 1988/01/01. doi: 10.1002/ssu.2980040104. PubMed PMID:  
291 3127871.
- 292 5. Solga AC, Pong WW, Kim KY, Cimino PJ, Toonen JA, Walker J, et al. RNA  
293 Sequencing of Tumor-Associated Microglia Reveals Ccl5 as a Stromal Chemokine  
294 Critical for Neurofibromatosis-1 Glioma Growth. *Neoplasia*. 2015;17(10):776-88.  
295 Epub 2015/11/21. doi: 10.1016/j.neo.2015.10.002. PubMed PMID: 26585233;  
296 PubMed Central PMCID: PMCPMC4656811.
- 297 6. Kohlmeyer JL, Kaemmer CA, Pulliam C, Maharjan CK, Samayoa AM, Major  
298 HJ, et al. RABL6A Is an Essential Driver of MPNSTs that Negatively Regulates the  
299 RB1 Pathway and Sensitizes Tumor Cells to CDK4/6 Inhibitors. *Clin Cancer Res*.  
300 2020;26(12):2997-3011. Epub 2020/02/23. doi: 10.1158/1078-0432.CCR-19-2706.  
301 PubMed PMID: 32086342; PubMed Central PMCID: PMCPMC7299809.
- 302 7. Cui Z, Shen Y, Chen KH, Mittal SK, Yang JY, Zhang G. KANK1 inhibits cell  
303 growth by inducing apoptosis through regulating CXXC5 in human malignant  
304 peripheral nerve sheath tumors. *Sci Rep*. 2017;7:40325. Epub 2017/01/10. doi:  
305 10.1038/srep40325. PubMed PMID: 28067315; PubMed Central PMCID:  
306 PMCPMC5220314.
- 307 8. Livak KJ, Schmittgen TD. Analysis of relative gene expression data using real-  
308 time quantitative PCR and the 2(-Delta Delta C(T)) Method. *Methods*.  
309 2001;25(4):402-8. Epub 2002/02/16. doi: 10.1006/meth.2001.1262. PubMed PMID:  
310 11846609.
- 311 9. Huggett J, Dheda K, Bustin S, Zumla A. Real-time RT-PCR normalisation;  
312 strategies and considerations. *Genes Immun*. 2005;6(4):279-84. Epub 2005/04/09.  
313 doi: 10.1038/sj.gene.6364190. PubMed PMID: 15815687.

- 314 10. Bustin SA, Benes V, Garson JA, Hellemans J, Huggett J, Kubista M, et al. The  
315 MIQE guidelines: minimum information for publication of quantitative real-time PCR  
316 experiments. *Clin Chem*. 2009;55(4):611-22. Epub 2009/02/28. doi:  
317 10.1373/clinchem.2008.112797. PubMed PMID: 19246619.
- 318 11. Kozera B, Rapacz M. Reference genes in real-time PCR. *J Appl Genet*.  
319 2013;54(4):391-406. Epub 2013/10/01. doi: 10.1007/s13353-013-0173-x. PubMed  
320 PMID: 24078518; PubMed Central PMCID: PMC3825189.
- 321 12. Kriegova E, Arakelyan A, Fillerova R, Zatloukal J, Mrazek F, Navratilova Z, et  
322 al. PSMB2 and RPL32 are suitable denominators to normalize gene expression  
323 profiles in bronchoalveolar cells. *BMC Mol Biol*. 2008;9:69. Epub 2008/08/02. doi:  
324 10.1186/1471-2199-9-69. PubMed PMID: 18671841; PubMed Central PMCID:  
325 PMC3825189.
- 326 13. Liu DW, Chen ST, Liu HP. Choice of endogenous control for gene expression in  
327 nonsmall cell lung cancer. *Eur Respir J*. 2005;26(6):1002-8. Epub 2005/12/02. doi:  
328 10.1183/09031936.05.00050205. PubMed PMID: 16319328.
- 329 14. Normann KR, Oystese KAB, Berg JP, Lekva T, Berg-Johnsen J, Bollerslev J, et  
330 al. Selection and validation of reliable reference genes for RT-qPCR analysis in a  
331 large cohort of pituitary adenomas. *Mol Cell Endocrinol*. 2016;437:183-9. Epub  
332 2016/08/27. doi: 10.1016/j.mce.2016.08.030. PubMed PMID: 27561203.
- 333 15. Wang X, He J, Wang W, Ren M, Gao S, Zhao G, et al. Validation of internal  
334 reference genes for relative quantitation studies of gene expression in human  
335 laryngeal cancer. *PeerJ*. 2016;4:e2763. Epub 2016/12/14. doi: 10.7717/peerj.2763.  
336 PubMed PMID: 27957397; PubMed Central PMCID: PMC5149058.
- 337 16. Rho HW, Lee BC, Choi ES, Choi IJ, Lee YS, Goh SH. Identification of valid  
338 reference genes for gene expression studies of human stomach cancer by reverse  
339 transcription-qPCR. *BMC Cancer*. 2010;10:240. Epub 2010/05/29. doi:  
340 10.1186/1471-2407-10-240. PubMed PMID: 20507635; PubMed Central PMCID:  
341 PMC2887403.
- 342 17. Li H, Chang LJ, Neubauer DR, Muir DF, Wallace MR. immortalization of  
343 human normal and NF1 neurofibroma Schwann cells. *Lab Invest*. 2016;96(10):1105-  
344 15. Epub 2016/09/13. doi: 10.1038/labinvest.2016.88. PubMed PMID: 27617404.
- 345 18. Liu Y, Qin Z, Cai L, Zou L, Zhao J, Zhong F. Selection of internal references for  
346 qRT-PCR assays of human hepatocellular carcinoma cell lines. *Biosci Rep*.  
347 2017;37(6). Epub 2017/11/29. doi: 10.1042/BSR20171281. PubMed PMID:  
348 29180379; PubMed Central PMCID: PMC5741833.
- 349 19. Vandesompele J, De Preter K, Pattyn F, Poppe B, Van Roy N, De Paepe A, et al.  
350 Accurate normalization of real-time quantitative RT-PCR data by geometric  
351 averaging of multiple internal control genes. *Genome Biol*.  
352 2002;3(7):RESEARCH0034. Epub 2002/08/20. doi: 10.1186/gb-2002-3-7-  
353 research0034. PubMed PMID: 12184808; PubMed Central PMCID:  
354 PMC126239.

- 355 20. Andersen CL, Jensen JL, Orntoft TF. Normalization of real-time quantitative  
356 reverse transcription-PCR data: a model-based variance estimation approach to  
357 identify genes suited for normalization, applied to bladder and colon cancer data sets.  
358 *Cancer Res.* 2004;64(15):5245-50. Epub 2004/08/04. doi: 10.1158/0008-5472.CAN-  
359 04-0496. PubMed PMID: 15289330.
- 360 21. Pfaffl MW, Tichopad A, Prgomet C, Neuvians TP. Determination of stable  
361 housekeeping genes, differentially regulated target genes and sample integrity:  
362 BestKeeper--Excel-based tool using pair-wise correlations. *Biotechnol Lett.*  
363 2004;26(6):509-15. Epub 2004/05/07. doi: 10.1023/b:bile.0000019559.84305.47.  
364 PubMed PMID: 15127793.
- 365 22. Xie F, Xiao P, Chen D, Xu L, Zhang B. miRDeepFinder: a miRNA analysis tool  
366 for deep sequencing of plant small RNAs. *Plant Mol Biol.* 2012. Epub 2012/02/01.  
367 doi: 10.1007/s11103-012-9885-2. PubMed PMID: 22290409.
- 368 23. Hellemans J, Vandesompele J. Selection of reliable reference genes for RT-qPCR  
369 analysis. *Methods Mol Biol.* 2014;1160:19-26. Epub 2014/04/18. doi: 10.1007/978-1-  
370 4939-0733-5\_3. PubMed PMID: 24740218.
- 371 24. Ali H, Du Z, Li X, Yang Q, Zhang YC, Wu M, et al. Identification of suitable  
372 reference genes for gene expression studies using quantitative polymerase chain  
373 reaction in lung cancer in vitro. *Mol Med Rep.* 2015;11(5):3767-73. Epub  
374 2015/01/13. doi: 10.3892/mmr.2015.3159. PubMed PMID: 25573171.
- 375 25. Yu S, Yang Q, Yang JH, Du Z, Zhang G. Identification of suitable reference  
376 genes for investigating gene expression in human gallbladder carcinoma using reverse  
377 transcription quantitative polymerase chain reaction. *Mol Med Rep.* 2015;11(4):2967-  
378 74. Epub 2014/12/02. doi: 10.3892/mmr.2014.3008. PubMed PMID: 25434674.
- 379 26. Ma H, Yang Q, Li D, Liu J. Validation of suitable reference genes for  
380 quantitative polymerase chain reaction analysis in rabbit bone marrow mesenchymal  
381 stem cell differentiation. *Mol Med Rep.* 2015;12(2):2961-8. Epub 2015/05/16. doi:  
382 10.3892/mmr.2015.3776. PubMed PMID: 25976103.
- 383 27. Derveaux S, Vandesompele J, Hellemans J. How to do successful gene  
384 expression analysis using real-time PCR. *Methods.* 2010;50(4):227-30. Epub  
385 2009/12/09. doi: 10.1016/j.ymeth.2009.11.001. PubMed PMID: 19969088.
- 386 28. Hummel TR, Jessen WJ, Miller SJ, Kluwe L, Mautner VF, Wallace MR, et al.  
387 Gene expression analysis identifies potential biomarkers of neurofibromatosis type 1  
388 including adrenomedullin. *Clin Cancer Res.* 2010;16(20):5048-57. Epub 2010/08/27.  
389 doi: 10.1158/1078-0432.CCR-10-0613. PubMed PMID: 20739432; PubMed Central  
390 PMCID: PMC4837895.
- 391 29. Karaosmanoglu B, Kocaepe CY, Soylemezoglu F, Anlar B, Varan A, Vargel I, et  
392 al. Heightened CXCR4 and CXCL12 expression in NF1-associated neurofibromas.  
393 *Childs Nerv Syst.* 2018;34(5):877-82. Epub 2018/02/20. doi: 10.1007/s00381-018-  
394 3745-6. PubMed PMID: 29455242.
- 395 30. Longo JF, Brosius SN, Black L, Worley SH, Wilson RC, Roth KA, et al. ErbB4  
396 promotes malignant peripheral nerve sheath tumor pathogenesis via Ras-independent

- 397 mechanisms. *Cell Commun Signal*. 2019;17(1):74. Epub 2019/07/12. doi:  
398 10.1186/s12964-019-0388-5. PubMed PMID: 31291965; PubMed Central PMCID:  
399 PMCPMC6621970.
- 400 31. Li X, Yang Q, Bai J, Yang Y, Zhong L, Wang Y. Identification of optimal  
401 reference genes for quantitative PCR studies on human mesenchymal stem cells. *Mol*  
402 *Med Rep*. 2015;11(2):1304-11. Epub 2014/11/06. doi: 10.3892/mmr.2014.2841.  
403 PubMed PMID: 25369870.
- 404 32. Oturai DB, Sondergaard HB, Bornsen L, Sellebjerg F, Christensen JR.  
405 Identification of Suitable Reference Genes for Peripheral Blood Mononuclear Cell  
406 Subset Studies in Multiple Sclerosis. *Scand J Immunol*. 2016;83(1):72-80. Epub  
407 2015/09/24. doi: 10.1111/sji.12391. PubMed PMID: 26395032.
- 408 33. Toritsuka M, Makinodan M, Yamauchi T, Yamashita Y, Ikawa D, Komori T, et  
409 al. Altered gene expression in lymphoblastoid cell lines after subculture. *In Vitro Cell*  
410 *Dev Biol Anim*. 2018;54(7):523-7. Epub 2018/06/28. doi: 10.1007/s11626-018-0267-  
411 1. PubMed PMID: 29948745.
- 412 34. Tokunaga K, Nakamura Y, Sakata K, Fujimori K, Ohkubo M, Sawada K, et al.  
413 Enhanced expression of a glyceraldehyde-3-phosphate dehydrogenase gene in human  
414 lung cancers. *Cancer Res*. 1987;47(21):5616-9. Epub 1987/11/01. PubMed PMID:  
415 3664468.
- 416 35. Revillion F, Pawlowski V, Hornez L, Peyrat JP. Glyceraldehyde-3-phosphate  
417 dehydrogenase gene expression in human breast cancer. *Eur J Cancer*.  
418 2000;36(8):1038-42. Epub 2000/07/08. doi: 10.1016/s0959-8049(00)00051-4.  
419 PubMed PMID: 10885609.
- 420 36. Ohl F, Jung M, Radonic A, Sachs M, Loening SA, Jung K. Identification and  
421 validation of suitable endogenous reference genes for gene expression studies of  
422 human bladder cancer. *J Urol*. 2006;175(5):1915-20. Epub 2006/04/08. doi:  
423 10.1016/S0022-5347(05)00919-5. PubMed PMID: 16600798.
- 424 37. Colell A, Green DR, Ricci JE. Novel roles for GAPDH in cell death and  
425 carcinogenesis. *Cell Death Differ*. 2009;16(12):1573-81. Epub 2009/09/26. doi:  
426 10.1038/cdd.2009.137. PubMed PMID: 19779498.
- 427 38. Guo C, Liu S, Sun MZ. Novel insight into the role of GAPDH playing in tumor.  
428 *Clin Transl Oncol*. 2013;15(3):167-72. Epub 2012/08/23. doi: 10.1007/s12094-012-  
429 0924-x. PubMed PMID: 22911551.
- 430 39. Coulson DT, Brockbank S, Quinn JG, Murphy S, Ravid R, Irvine GB, et al.  
431 Identification of valid reference genes for the normalization of RT qPCR gene  
432 expression data in human brain tissue. *BMC Mol Biol*. 2008;9:46. Epub 2008/05/08.  
433 doi: 10.1186/1471-2199-9-46. PubMed PMID: 18460208; PubMed Central PMCID:  
434 PMCPMC2396658.
- 435 40. Pombo-Suarez M, Calaza M, Gomez-Reino JJ, Gonzalez A. Reference genes for  
436 normalization of gene expression studies in human osteoarthritic articular cartilage.  
437 *BMC Mol Biol*. 2008;9:17. Epub 2008/01/30. doi: 10.1186/1471-2199-9-17. PubMed  
438 PMID: 18226276; PubMed Central PMCID: PMCPMC2248200.

- 439 41. Abruzzo LV, Lee KY, Fuller A, Silverman A, Keating MJ, Medeiros LJ, et al.  
440 Validation of oligonucleotide microarray data using microfluidic low-density arrays: a  
441 new statistical method to normalize real-time RT-PCR data. *Biotechniques*.  
442 2005;38(5):785-92. Epub 2005/06/11. doi: 10.2144/05385MT01. PubMed PMID:  
443 15945375.
- 444 42. Dydensborg AB, Herring E, Auclair J, Tremblay E, Beaulieu JF. Normalizing  
445 genes for quantitative RT-PCR in differentiating human intestinal epithelial cells and  
446 adenocarcinomas of the colon. *Am J Physiol Gastrointest Liver Physiol*.  
447 2006;290(5):G1067-74. Epub 2006/01/10. doi: 10.1152/ajpgi.00234.2005. PubMed  
448 PMID: 16399877.
- 449 43. Lyng MB, Laenkholm AV, Pallisgaard N, Ditzel HJ. Identification of genes for  
450 normalization of real-time RT-PCR data in breast carcinomas. *BMC Cancer*.  
451 2008;8:20. Epub 2008/01/24. doi: 10.1186/1471-2407-8-20. PubMed PMID:  
452 18211679; PubMed Central PMCID: PMCPMC2248196.
- 453 44. Urbatzka R, Galante-Oliveira S, Rocha E, Castro LF, Cunha I. Normalization  
454 strategies for gene expression studies by real-time PCR in a marine fish species,  
455 *Scophthalmus maximus*. *Mar Genomics*. 2013;10:17-25. Epub 2013/03/23. doi:  
456 10.1016/j.margen.2013.02.001. PubMed PMID: 23517768.
- 457  
458

## 459 **Figure legend**

460  
461 **Fig 1.  $C_t$  values of the candidate internal reference genes.** Dots represent the mean  
462  $C_t$  value; bars represent the mean  $\pm$  standard deviation. (A)  $C_t$  values of each  
463 candidate internal reference gene in *NFI*<sup>+/+</sup> SC, *NFI*<sup>-/-</sup> pNF and MPNST cell lines  
464 ( $n=14$ ). (B)  $C_t$  values of each candidate internal reference gene in SC and pNF cell  
465 lines ( $n = 7$ ). SC, Schwann cell; pNF, plexiform neurofibroma; MPNST, malignant  
466 peripheral nerve sheath tumor.

467  
468 **Fig 2. Analysis results of geNorm program.** The expression stability of eleven  
469 candidate genes in SC + pNF + MPNST subset (A) and SC + pNF subset (C) was  
470 calculated and ranked separately. The *x-axis* represents various candidate reference  
471 genes, and the *y-axis* represents stability value (*M* value). Lower *M* value suggests  
472 higher expression stability. B and D show the optimal number of reference genes in  
473 different subsets. The *x-axis* represents the number of genes selected for  
474 comprehensive analysis  $V (n/n+1)$ , and the *y-axis* means the pairwise variation value  
475 (*V* value). When *V* value is under 0.15, the corresponding combination is esteemed  
476 stable and *n* is the best number of internal reference genes. SC, Schwann cell; pNF,  
477 plexiform neurofibroma; MPNST, malignant peripheral nerve sheath tumor.

478

479 **Fig 3. Analysis results of NormFinder program.** The *x-axis* represents various  
480 candidate reference genes, and the *y-axis* represents stability value. (A) The stability  
481 value of each candidate internal reference gene in SC + pNF + MPNST subset ( $n=14$ ).  
482 (B) The stability value of each candidate internal reference gene in SC + pNF subset  
483 ( $n=7$ ). SC, Schwann cell; pNF, plexiform neurofibroma; MPNST, malignant  
484 peripheral nerve sheath tumor.

485  
486 **Fig 4. Analysis results of BestKeeper program.** The *x-axis* represents various  
487 candidate reference genes, and the *y-axis* represents stability value. (A) The stability  
488 value of each candidate internal reference gene in SC + pNF + MPNST subset ( $n=14$ ).  
489 (B) The stability value of each candidate internal reference gene in SC + pNF subset  
490 ( $n=7$ ). SC, Schwann cell; pNF, plexiform neurofibroma; MPNST, malignant  
491 peripheral nerve sheath tumor.

492  
493 **Fig 5. Analysis results of  $\Delta C_t$  algorithm.** The *x-axis* represents various candidate  
494 reference genes, and the *y-axis* represents stability value. (A) The stability value of  
495 each candidate internal reference gene in SC + pNF + MPNST subset ( $n=14$ ). (B) The  
496 stability value of each candidate internal reference gene in SC + pNF subset ( $n=7$ ).  
497 SC, Schwann cell; pNF, plexiform neurofibroma; MPNST, malignant peripheral  
498 nerve sheath tumor.

499  
500 **Fig 6. Analysis results of ReFinder program.** The *x-axis* represents various  
501 candidate reference genes, and the *y-axis* represents stability value. (A) The stability  
502 value of each candidate internal reference gene in SC + pNF + MPNST subset ( $n=14$ ).  
503 (B) The stability value of each candidate internal reference gene in SC + pNF subset  
504 ( $n=7$ ). SC, Schwann cell; pNF, plexiform neurofibroma; MPNST, malignant  
505 peripheral nerve sheath tumor.

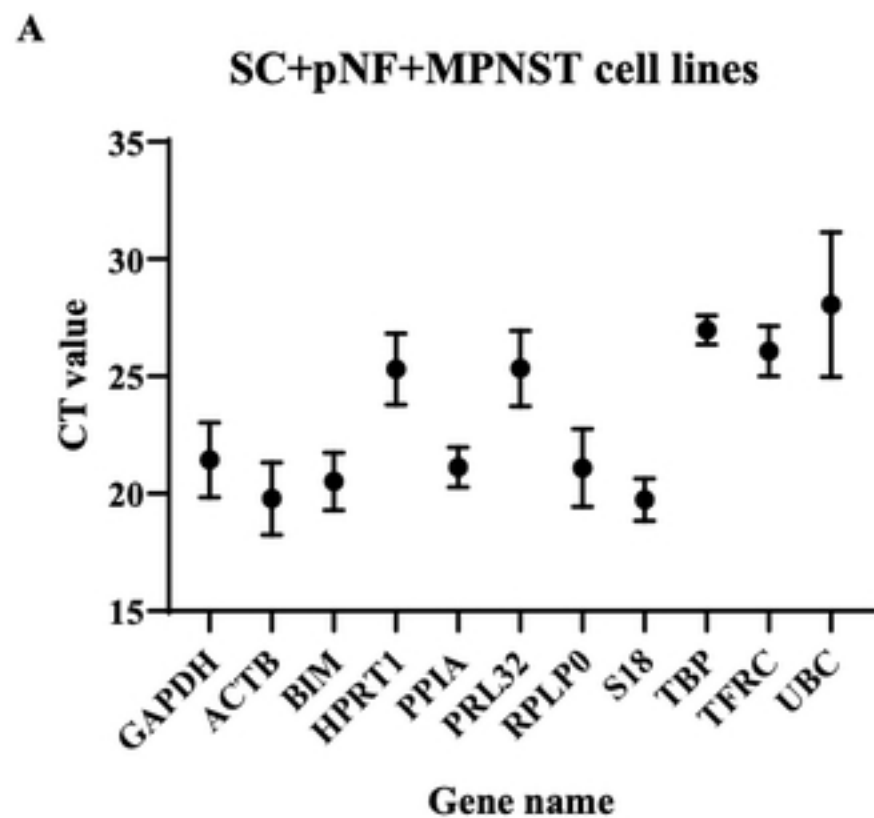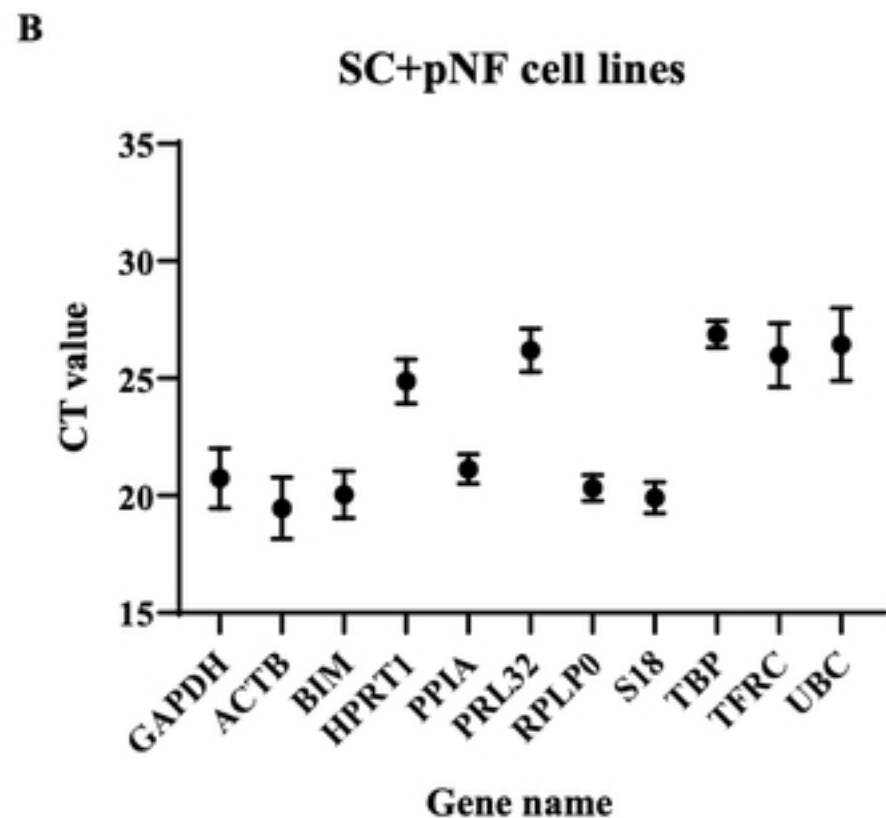

Fig 1

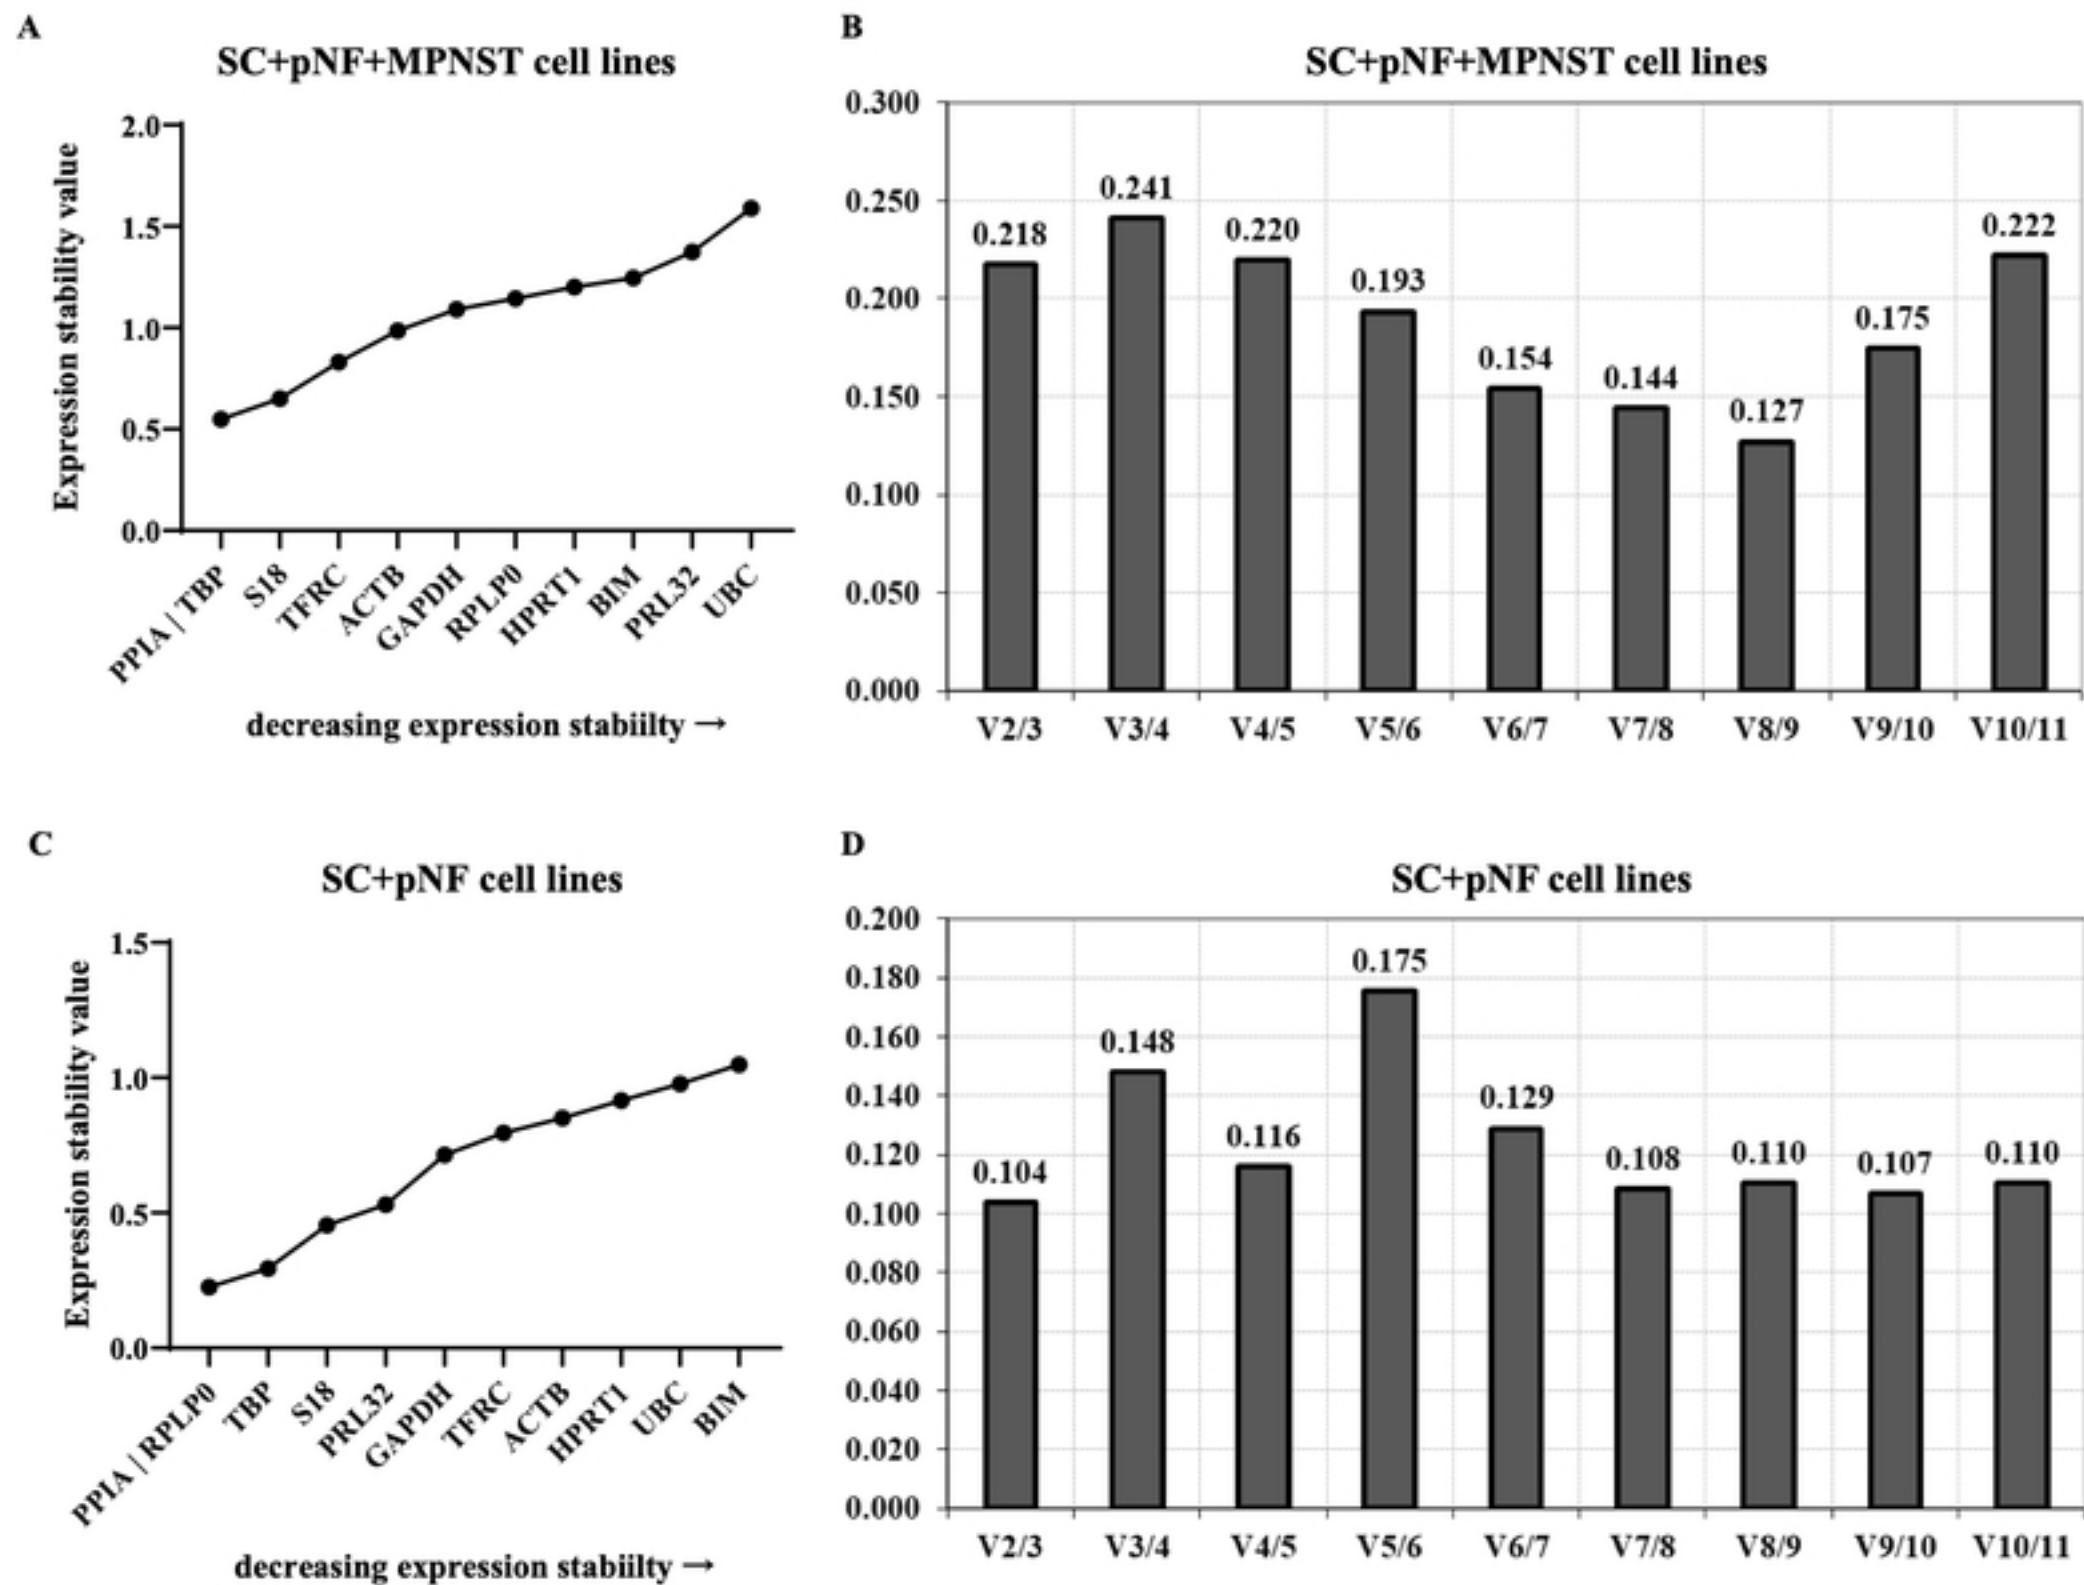

Fig 2



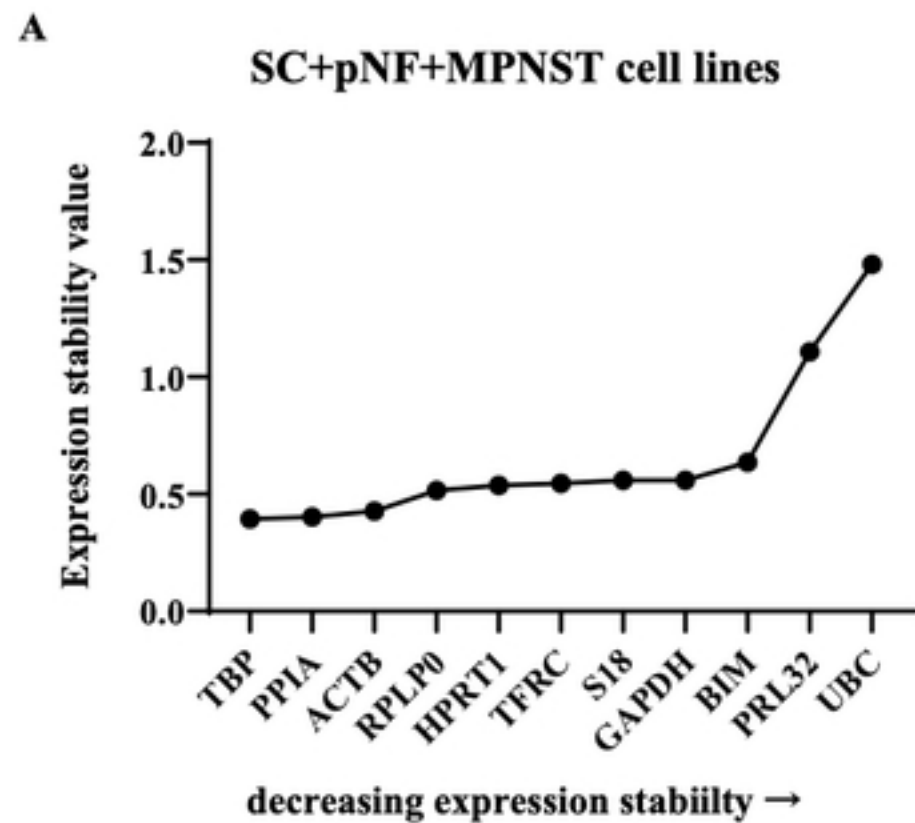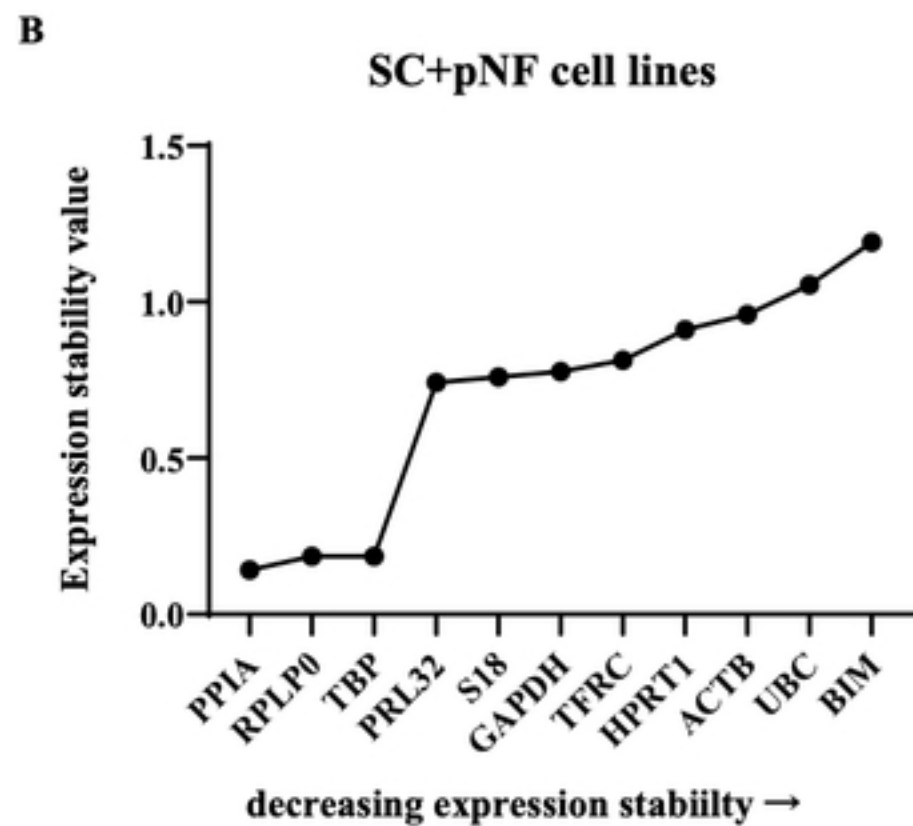

Fig 3

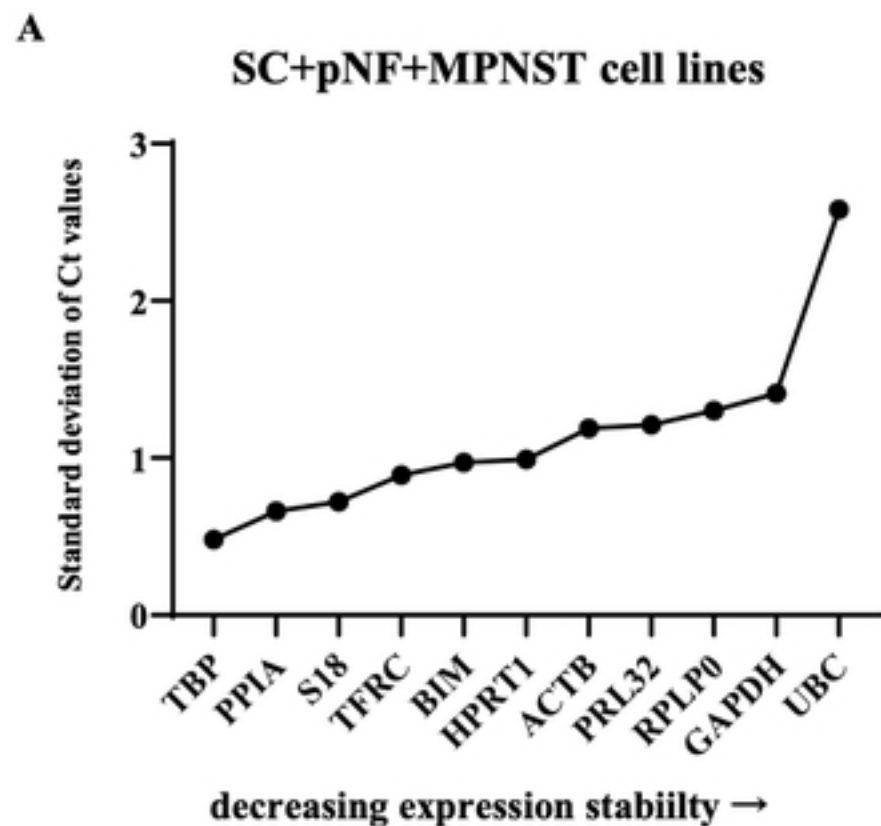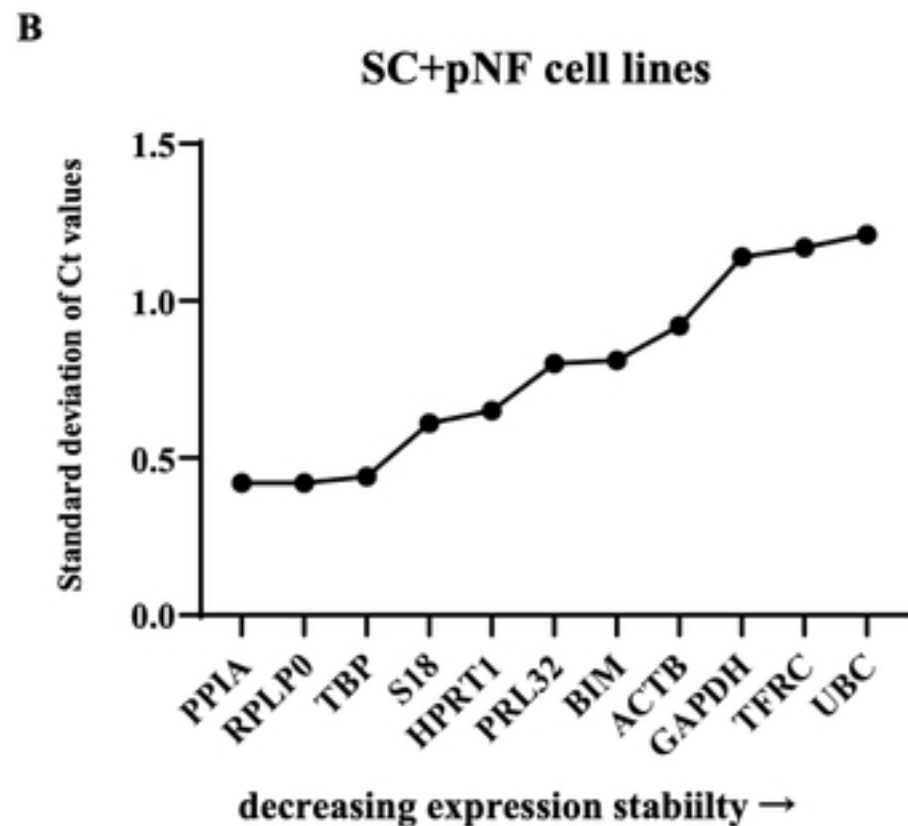

Fig 4

A

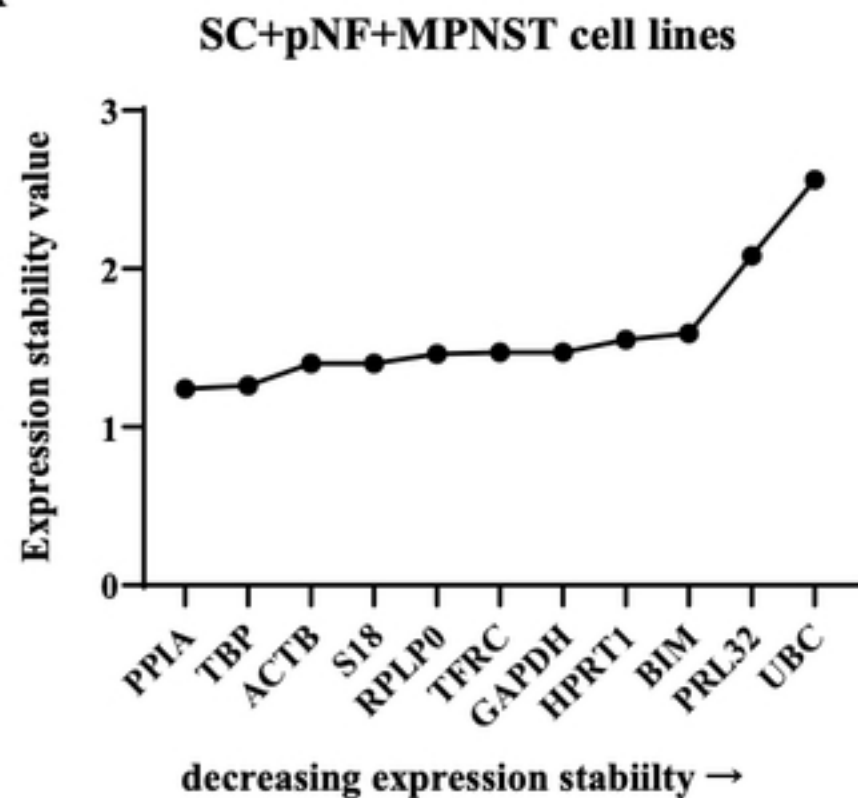

B

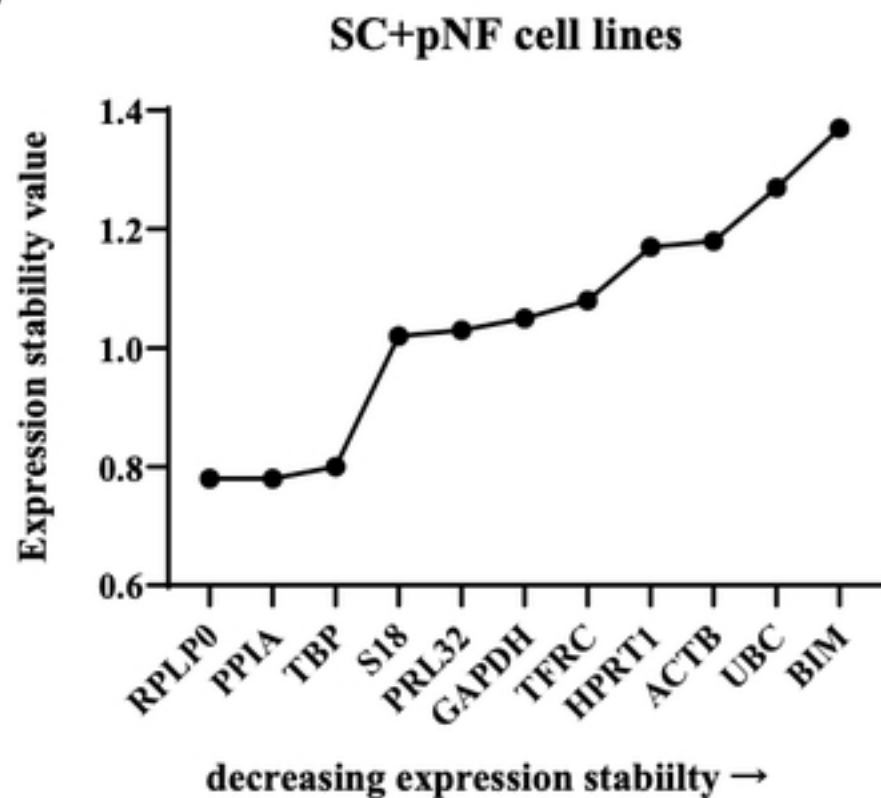

Fig 5

**A****SC+pNF+MPNST cell lines**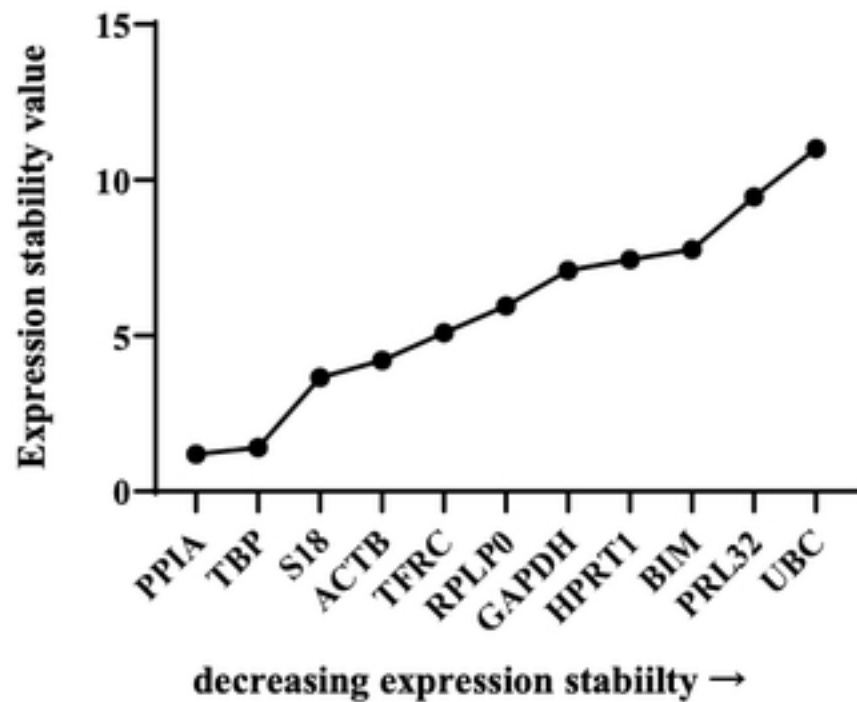**B****SC+pNF cell lines**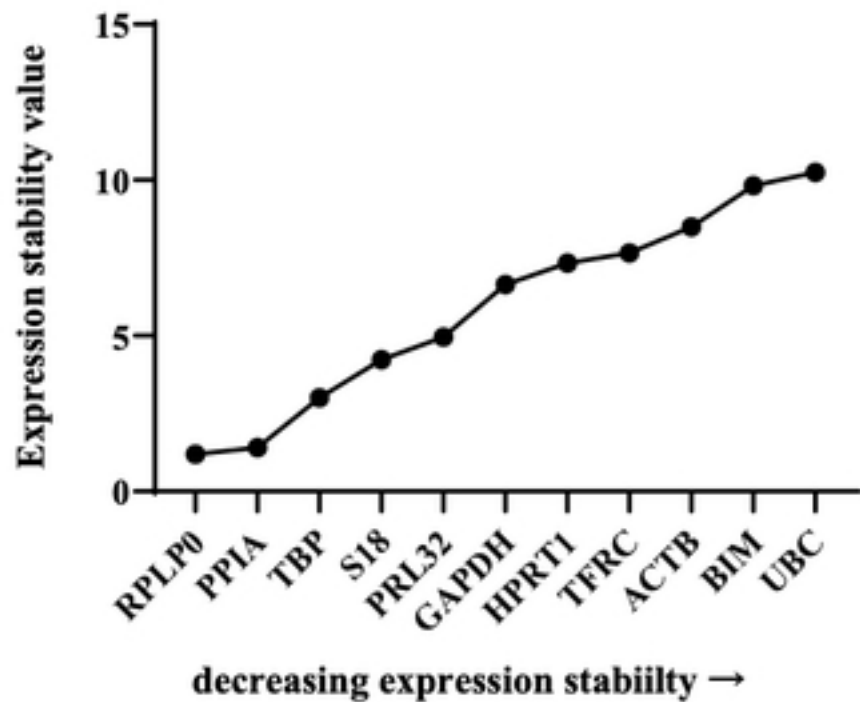

Fig 6
